# Supplementary material for: Occupational Factors and Socioeconomic Differences in Breast Cancer Risk and Stage at Diagnosis in Swiss Working Women
Source: MDPI journal article supplement (doi:10.3390/cancers14153713), 2022-07-29
Supplement: s1 [file s1]

**Table S1:** Relative risk (RR) with confidence interval (95%CI) of breast cancer by occupational, socio-professional, economical activity and skill level category, among females aged 18-85 years in western Switzerland, 2005-2014

| Occupational variables                                       | Nb cases | Person-years (in 100'000) | Models 1*<br>RR   |                    | Models 2 **<br>RR |                    | Models 3 ***<br>RR |                    |
|--------------------------------------------------------------|----------|---------------------------|-------------------|--------------------|-------------------|--------------------|--------------------|--------------------|
| <b>Occupation<sup>a</sup></b>                                |          |                           | <b>p&lt;0.001</b> |                    | <b>p&lt;0.001</b> |                    | <b>p&lt;0.001</b>  |                    |
| 1. Legislators, senior officials and managers                | 259      | 1.17                      | 1.00              | Ref.               | 1.00              | Ref.               | 1.00               | Ref.               |
| 2. Professionals                                             | 630      | 2.64                      | 1.08              | [0.93,1.24]        | 1.14              | [0.99,1.32]        | 1.15               | [0.99,1.33]        |
| 3. Technicians and associate professionals                   | 1'176    | 5.96                      | 0.89              | [0.77,1.02]        | 0.97              | [0.85,1.11]        | 0.98               | [0.85,1.12]        |
| 4. Clerks                                                    | 1'176    | 5.50                      | 0.96              | [0.84,1.10]        | 1.05              | [0.91,1.20]        | 1.05               | [0.92,1.20]        |
| 5. Service workers and shop and market sales workers         | 868      | 4.69                      | <b>0.83</b>       | <b>[0.72,0.96]</b> | 0.91              | [0.79,1.05]        | 0.91               | [0.79,1.05]        |
| 6. Skilled agricultural and fishery workers                  | 47       | 0.29                      | 0.73              | [0.53,1.00]        | 0.78              | [0.57,1.06]        | 0.78               | [0.57,1.06]        |
| 7. Craft and related trades workers                          | 133      | 0.68                      | 0.89              | [0.72,1.09]        | 0.97              | [0.79,1.20]        | 0.98               | [0.79,1.21]        |
| 8. Plant and machine operators and assemblers                | 44       | 0.24                      | 0.81              | [0.58,1.12]        | 0.81              | [0.59,1.11]        | 0.81               | [0.58,1.11]        |
| 9. Elementary occupations                                    | 225      | 1.10                      | 0.92              | [0.77,1.10]        | 0.89              | [0.74,1.06]        | 0.88               | [0.74,1.06]        |
| <b>Socioprofessional category</b>                            |          |                           | <b>p&lt;0.001</b> |                    | <b>p&lt;0.001</b> |                    | <b>p=0.003</b>     |                    |
| Top management and independent professions                   | 130      | 0.50                      | 1.00              | Ref.               | 1.00              | Ref.               | 1.00               | Ref.               |
| Other self-employed                                          | 467      | 1.66                      | 1.07              | [0.88,1.31]        | 1.04              | [0.86,1.27]        | 1.03               | [0.85,1.26]        |
| Professionals and senior management                          | 504      | 2.21                      | 0.87              | [0.71,1.05]        | 1.00              | [0.83,1.21]        | 1.01               | [0.83,1.23]        |
| Supervisors/low level management and skilled labour          | 2'608    | 13.80                     | <b>0.72</b>       | <b>[0.60,0.86]</b> | 0.88              | [0.74,1.05]        | 0.89               | [0.74,1.06]        |
| Unskilled employees and workers                              | 830      | 4.01                      | <b>0.79</b>       | <b>[0.65,0.95]</b> | 0.85              | [0.71,1.02]        | 0.86               | [0.71,1.04]        |
| In paid employment, not classified elsewhere                 | 19       | 0.09                      | 0.81              | [0.50,1.32]        | 0.90              | [0.56,1.46]        | 0.90               | [0.56,1.46]        |
| <b>Skill level required for the occupation</b>               |          |                           | <b>p&lt;0.001</b> |                    | <b>p=0.006</b>    |                    | <b>p=0.007</b>     |                    |
| Lowest skill level                                           | 225      | 1.10                      | 1.00              | Ref.               | 1.00              | Ref.               | 1.00               | Ref.               |
| 2nd lowest skill level                                       | 2'268    | 11.41                     | 0.98              | [0.85,1.12]        | 1.10              | [0.96,1.26]        | 1.10               | [0.96,1.26]        |
| 2nd highest skill level                                      | 1'176    | 5.96                      | 0.97              | [0.84,1.12]        | 1.10              | [0.95,1.27]        | 1.10               | [0.95,1.27]        |
| Highest skill level                                          | 889      | 3.81                      | 1.15              | [0.99,1.33]        | <b>1.23</b>       | <b>[1.07,1.43]</b> | <b>1.23</b>        | <b>[1.06,1.43]</b> |
| <b>Economic activity branch<sup>b</sup></b>                  |          |                           | <b>p&lt;0.001</b> |                    | p=0.059           |                    | p=0.123            |                    |
| Unknown                                                      | 424      | 1.88                      | 1.07              | [0.95,1.21]        | 1.04              | [0.92,1.17]        | 1.04               | [0.92,1.17]        |
| A-B Agriculture, hunting, forestry, fishing and fish farming | 119      | 0.48                      | 1.18              | [0.97,1.43]        | 1.11              | [0.91,1.34]        | 1.10               | [0.90,1.33]        |
| C Mining and quarrying                                       | 2        | 0.01                      | 1.26              | [0.31,5.18]        | 1.23              | [0.31,4.92]        | 1.24               | [0.31,4.98]        |
| D Manufacture of goods                                       | 310      | 1.65                      | 0.89              | [0.78,1.02]        | 0.96              | [0.84,1.09]        | 0.97               | [0.85,1.10]        |
| E Electricity, gas and water supply                          | 12       | 0.07                      | 0.82              | [0.46,1.46]        | 0.87              | [0.49,1.53]        | 0.87               | [0.49,1.54]        |

|                                                                                          |     |      |                         |                         |                         |
|------------------------------------------------------------------------------------------|-----|------|-------------------------|-------------------------|-------------------------|
| F Construction                                                                           | 69  | 0.34 | 0.96 [0.75,1.23]        | 0.96 [0.75,1.23]        | 0.96 [0.75,1.22]        |
| G Trade; repair of motor vehicles and of domestic articles                               | 710 | 3.73 | 0.91 [0.82,1.00]        | 0.95 [0.86,1.05]        | 0.96 [0.86,1.06]        |
| H Hotels and restaurants                                                                 | 233 | 1.29 | 0.86 [0.74,1.00]        | 0.95 [0.82,1.09]        | 0.96 [0.83,1.11]        |
| I Transport and communication                                                            | 161 | 0.96 | <b>0.80 [0.67,0.94]</b> | 0.89 [0.75,1.05]        | 0.90 [0.76,1.06]        |
| J Financial intermediation; insurance                                                    | 244 | 1.32 | 0.88 [0.76,1.02]        | 0.98 [0.85,1.14]        | 0.99 [0.86,1.15]        |
| K Real estate, renting, IT activities; research and development; other business services | 442 | 2.15 | 0.98 [0.87,1.10]        | 1.05 [0.94,1.18]        | 1.07 [0.95,1.20]        |
| LA Public administration                                                                 | 192 | 0.72 | <b>1.28 [1.09,1.50]</b> | <b>1.23 [1.05,1.45]</b> | <b>1.22 [1.04,1.43]</b> |
| LB Defence                                                                               | 47  | 0.25 | 0.90 [0.67,1.22]        | 0.94 [0.70,1.27]        | 0.94 [0.70,1.26]        |
| LC Compulsory social security                                                            | 16  | 0.07 | 1.14 [0.69,1.88]        | 1.19 [0.73,1.96]        | 1.20 [0.73,1.96]        |
| M Education                                                                              | 498 | 2.10 | <b>1.13 [1.01,1.27]</b> | 1.06 [0.95,1.19]        | 1.06 [0.95,1.19]        |
| N Health and social activities                                                           | 792 | 3.76 | 1.00 Ref.               | 1.00 Ref.               | 1.00 Ref.               |
| O Other community, social and personal service activities                                | 267 | 1.38 | 0.92 [0.80,1.06]        | 0.94 [0.82,1.08]        | 0.95 [0.83,1.09]        |
| Q Extra-territorial organizations and bodies                                             | 20  | 0.13 | 0.71 [0.45,1.11]        | <b>0.58 [0.37,0.90]</b> | <b>0.60 [0.39,0.94]</b> |

<sup>a</sup> Occupation is coded on 1 digit using the International Classification of Occupations, version 1988 (ISCO-88).

<sup>b</sup> Economic activity/industry is coded using the General Classification of Economic Activities (NOGA), based on ISCI third and NACE first revisions

\* Univariate model

\*\* Adjusted for age, period and canton

\*\*\* Adjusted for age, period, canton, civil status, civil status x age and nationality

Statistically significant estimates and p-values<0.05 are shown in bold

**Table S2:** Relative risk (RR) with confidence interval (95%CI) of breast cancer by occupational, socio-professional, economical activity and skill level category, among females aged 18-49 years in in Swiss cantons of Neuchâtel, Geneva, Vaud and Wallis, 1990-2014

| Occupational variables                                      | Nb cases | Person-years (in 100'000) | Models 1*<br>RR         | Models 2 **<br>RR       | Models 3 ***<br>RR      |
|-------------------------------------------------------------|----------|---------------------------|-------------------------|-------------------------|-------------------------|
| <b>Occupation<sup>a</sup></b>                               |          |                           | <b>p&lt;0.001</b>       | <b>p=0.002</b>          | <b>p&lt;0.001</b>       |
| 1. Legislators, senior officials and managers               | 143      | 1.61                      | 1.00 Ref.               | 1.00 Ref.               | 1.00 Ref.               |
| 2. Professionals                                            | 415      | 3.97                      | 1.19 [0.96,1.47]        | 1.18 [0.95,1.46]        | 1.22 [0.99,1.52]        |
| 3. Technicians and associate professionals                  | 757      | 9.01                      | 1.06 [0.86,1.29]        | 1.07 [0.88,1.31]        | 1.11 [0.90,1.35]        |
| 4. Clerks                                                   | 704      | 9.43                      | 1.00 [0.82,1.23]        | 1.03 [0.84,1.26]        | 1.04 [0.85,1.28]        |
| 5. Service workers and shop and market sales workers        | 469      | 7.14                      | 0.86 [0.69,1.05]        | 0.89 [0.72,1.10]        | 0.89 [0.72,1.10]        |
| 6. Skilled agricultural and fishery workers                 | 28       | 0.43                      | 0.77 [0.49,1.21]        | 0.79 [0.50,1.25]        | 0.78 [0.49,1.24]        |
| 7. Craft and related trades workers                         | 93       | 1.07                      | 0.98 [0.73,1.30]        | 0.98 [0.73,1.31]        | 1.00 [0.74,1.33]        |
| 8. Plant and machine operators and assemblers               | 23       | 0.36                      | 0.69 [0.43,1.11]        | 0.68 [0.42,1.10]        | 0.68 [0.42,1.09]        |
| 9. Elementary occupations                                   | 211      | 3.68                      | 0.87 [0.68,1.11]        | 0.83 [0.65,1.07]        | 0.80 [0.62,1.02]        |
| <b>Socioprofessional category</b>                           |          |                           | <b>p&lt;0.001</b>       | <b>p&lt;0.001</b>       | <b>p&lt;0.001</b>       |
| Top management and independent professions                  | 73       | 0.53                      | 1.00 Ref.               | 1.00 Ref.               | 1.00 Ref.               |
| Other self-employed                                         | 195      | 1.81                      | 0.83 [0.62,1.13]        | 0.87 [0.64,1.18]        | 0.81 [0.59,1.09]        |
| Professionals and senior management                         | 332      | 3.16                      | 0.78 [0.59,1.04]        | 0.77 [0.58,1.02]        | 0.80 [0.60,1.07]        |
| Supervisors/low level management and skilled labour         | 1732     | 23.00                     | <b>0.64 [0.50,0.83]</b> | <b>0.66 [0.51,0.86]</b> | <b>0.68 [0.53,0.89]</b> |
| Unskilled employees and workers                             | 477      | 7.30                      | <b>0.58 [0.44,0.76]</b> | <b>0.58 [0.44,0.76]</b> | <b>0.59 [0.44,0.78]</b> |
| In paid employment, not classified elsewhere                | 34       | 0.90                      | <b>0.49 [0.30,0.79]</b> | <b>0.44 [0.27,0.72]</b> | <b>0.46 [0.28,0.75]</b> |
| <b>Skill level required for the occupation</b>              |          |                           | <b>p&lt;0.001</b>       | <b>p=0.002</b>          | <b>p&lt;0.001</b>       |
| Lowest skill level                                          | 211      | 3.68                      | 1.00 Ref.               | 1.00 Ref.               | 1.00 Ref.               |
| 2nd lowest skill level                                      | 1317     | 18.44                     | 1.07 [0.90,1.27]        | 1.15 [0.96,1.37]        | <b>1.20 [1.01,1.44]</b> |
| 2nd highest skill level                                     | 757      | 9.01                      | <b>1.22 [1.01,1.46]</b> | <b>1.29 [1.07,1.55]</b> | <b>1.37 [1.14,1.66]</b> |
| Highest skill level                                         | 558      | 5.57                      | <b>1.31 [1.08,1.58]</b> | <b>1.35 [1.11,1.63]</b> | <b>1.44 [1.18,1.74]</b> |
| <b>Economic activity branch<sup>b</sup></b>                 |          |                           | <b>p=0.002</b>          | <b>p=0.001</b>          | <b>p=0.009</b>          |
| Unknown                                                     | 169      | 1.98                      | 0.94 [0.77,1.14]        | 0.95 [0.78,1.15]        | 0.95 [0.78,1.15]        |
| A-B Agriculture,hunting, forestry, fishing and fish farming | 53       | 0.55                      | 1.01 [0.73,1.39]        | 1.04 [0.75,1.45]        | 0.96 [0.70,1.33]        |
| D Manufacture of goods                                      | 241      | 3.29                      | 0.86 [0.72,1.03]        | 0.85 [0.70,1.01]        | 0.85 [0.71,1.03]        |

|                                                                                          |     |      |                         |                         |                         |
|------------------------------------------------------------------------------------------|-----|------|-------------------------|-------------------------|-------------------------|
| E Electricity, gas and water supply                                                      | 6   | 0.10 | 0.54 [0.23,1.28]        | 0.53 [0.22,1.26]        | 0.54 [0.23,1.28]        |
| F Construction                                                                           | 44  | 0.53 | 0.89 [0.63,1.27]        | 0.88 [0.61,1.26]        | 0.84 [0.59,1.21]        |
| G Trade; repair of motor vehicles and of domestic articles                               | 441 | 6.39 | <b>0.81 [0.70,0.94]</b> | <b>0.80 [0.69,0.93]</b> | <b>0.81 [0.69,0.94]</b> |
| H Hotels and restaurants                                                                 | 155 | 2.38 | <b>0.79 [0.64,0.97]</b> | <b>0.79 [0.64,0.97]</b> | 0.81 [0.66,1.00]        |
| I Transport and communication                                                            | 96  | 1.71 | <b>0.63 [0.49,0.80]</b> | <b>0.60 [0.47,0.77]</b> | <b>0.62 [0.48,0.79]</b> |
| J Financial intermediation; insurance                                                    | 183 | 2.66 | 0.91 [0.75,1.10]        | 0.86 [0.70,1.04]        | 0.89 [0.73,1.08]        |
| K Real estate, renting, IT activities; research and development; other business services | 297 | 3.76 | 0.89 [0.75,1.05]        | 0.85 [0.72,1.01]        | 0.88 [0.74,1.03]        |
| LA Public administration                                                                 | 115 | 1.20 | 1.06 [0.83,1.34]        | 1.01 [0.79,1.28]        | 0.98 [0.77,1.25]        |
| LB Defence                                                                               | 18  | 0.20 | 0.87 [0.53,1.42]        | 0.90 [0.55,1.49]        | 0.90 [0.55,1.48]        |
| LC Compulsory social security                                                            | 5   | 0.06 | 0.79 [0.31,1.99]        | 0.79 [0.31,2.00]        | 0.80 [0.32,2.02]        |
| M Education                                                                              | 320 | 3.23 | 1.17 [0.99,1.38]        | 1.12 [0.95,1.33]        | 1.12 [0.94,1.32]        |
| N Health and social activities                                                           | 484 | 5.91 | 1.00 Ref.               | 1.00 Ref.               | 1.00 Ref.               |
| O Other community, social and personal service activities                                | 182 | 2.20 | 0.90 [0.74,1.09]        | 0.87 [0.72,1.06]        | 0.89 [0.73,1.08]        |
| P Domestic services                                                                      | 13  | 0.23 | 0.76 [0.38,1.49]        | 0.61 [0.31,1.23]        | 0.64 [0.32,1.26]        |
| Q Extra-territorial organizations and bodies                                             | 20  | 0.30 | 0.83 [0.50,1.37]        | 0.68 [0.40,1.14]        | 0.75 [0.45,1.26]        |

<sup>a</sup> Occupation is coded using the International Classification of Occupations, version 1988 (ISCO-88), coded on 1 digit.

<sup>b</sup> Economic activity/industry is coded using the General Classification of Economic Activities (NOGA), based on ISCI third and NACE first revisions

\* Univariate model

\*\* Adjusted for age, time period and canton

\*\*\* Adjusted for age, time period, canton, civil status, civil status x age and nationality

Statistically significant estimates and p-values<0.05 are shown in bold

**Table S3:** Relative risk (RR) with confidence interval (95%CI) of breast cancer by occupational, socio-professional, economical activity and skill level category, among females aged 50-85 years in in Swiss cantons of Neuchâtel, Geneva, Vaud and Wallis, 1990-2014

| Occupational variables                                      | Nb cases | Person-years (in 100'000) | Models 1*<br>RR         | Models 2 **<br>RR       | Models 3 ***<br>RR      |
|-------------------------------------------------------------|----------|---------------------------|-------------------------|-------------------------|-------------------------|
| <b>Occupation<sup>a</sup></b>                               |          |                           | <b>p&lt;0.001</b>       | <b>p=0.002</b>          | <b>p&lt;0.001</b>       |
| 3. Technicians and associate professionals                  | 1367     | 4.36                      | 0.96 [0.85,1.09]        | 0.98 [0.86,1.11]        | 0.97 [0.86,1.10]        |
| 4. Clerks                                                   | 1579     | 4.75                      | 1.07 [0.95,1.21]        | 1.09 [0.96,1.23]        | 1.09 [0.96,1.23]        |
| 5. Service workers and shop and market sales workers        | 1060     | 3.69                      | 0.91 [0.80,1.03]        | 0.95 [0.83,1.07]        | 0.96 [0.84,1.09]        |
| 6. Skilled agricultural and fishery workers                 | 73       | 0.29                      | 0.81 [0.61,1.07]        | 0.84 [0.63,1.12]        | 0.84 [0.63,1.12]        |
| 7. Craft and related trades workers                         | 182      | 0.638                     | 0.87 [0.72,1.05]        | 0.87 [0.71,1.05]        | 0.88 [0.72,1.06]        |
| 8. Plant and machine operators and assemblers               | 70       | 0.24                      | 0.88 [0.67,1.15]        | 0.88 [0.67,1.16]        | 0.90 [0.68,1.18]        |
| 9. Elementary occupations                                   | 496      | 2.12                      | <b>0.78 [0.68,0.91]</b> | <b>0.76 [0.66,0.89]</b> | <b>0.78 [0.67,0.91]</b> |
| <b>Socioprofessional category</b>                           |          |                           | <b>p&lt;0.001</b>       | <b>p&lt;0.001</b>       | <b>p&lt;0.001</b>       |
| Top management and independent professions                  | 159      | 0.45                      | 1.00 Ref.               | 1.00 Ref.               | 1.00 Ref.               |
| Other self-employed                                         | 628      | 1.87                      | 0.99 [0.82,1.19]        | 1.03 [0.85,1.24]        | 1.03 [0.86,1.25]        |
| Professionals and senior management                         | 594      | 1.67                      | 1.04 [0.86,1.25]        | 1.04 [0.86,1.25]        | 1.04 [0.86,1.25]        |
| Supervisors/low level management and skilled labour         | 3271     | 10.31                     | 0.95 [0.80,1.13]        | 0.99 [0.83,1.17]        | 0.99 [0.84,1.18]        |
| Unskilled employees and workers                             | 1234     | 4.73                      | <b>0.81 [0.68,0.96]</b> | <b>0.83 [0.70,0.99]</b> | 0.86 [0.71,1.02]        |
| In paid employment, not classified elsewhere                | 89       | 0.35                      | 0.91 [0.67,1.22]        | 0.86 [0.64,1.17]        | 0.87 [0.65,1.18]        |
| <b>Skill level required for the occupation</b>              |          |                           | <b>p&lt;0.001</b>       | <b>p&lt;0.001</b>       | <b>p&lt;0.001</b>       |
| Lowest skill level                                          | 496      | 2.12                      | 1.00 Ref.               | 1.00 Ref.               | 1.00 Ref.               |
| 2nd lowest skill level                                      | 2964     | 9.60                      | <b>1.25 [1.12,1.39]</b> | <b>1.31 [1.17,1.46]</b> | <b>1.28 [1.15,1.43]</b> |
| 2nd highest skill level                                     | 1367     | 4.36                      | <b>1.23 [1.09,1.38]</b> | <b>1.27 [1.13,1.43]</b> | <b>1.23 [1.09,1.39]</b> |
| Highest skill level                                         | 1148     | 3.30                      | <b>1.37 [1.22,1.54]</b> | <b>1.39 [1.23,1.57]</b> | <b>1.34 [1.19,1.52]</b> |
| <b>Economic activity branch<sup>b</sup></b>                 |          |                           | <b>p=0.022</b>          | <b>p=0.050</b>          | <b>p=0.067</b>          |
| Unknown                                                     | 467      | 1.37                      | 1.10 [0.98,1.24]        | 1.09 [0.97,1.23]        | 1.10 [0.98,1.24]        |
| A-B Agriculture,hunting, forestry, fishing and fish farming | 132      | 0.48                      | 0.91 [0.74,1.11]        | 0.93 [0.76,1.15]        | 0.93 [0.76,1.15]        |
| D Manufacture of goods                                      | 491      | 1.70                      | 0.99 [0.88,1.12]        | 0.98 [0.87,1.11]        | 0.99 [0.87,1.12]        |
| E Electricity, gas and water supply                         | 17       | 0.06                      | 0.96 [0.58,1.58]        | 0.98 [0.59,1.63]        | 0.96 [0.58,1.60]        |
| F Construction                                              | 80       | 0.31                      | <b>0.77 [0.60,0.99]</b> | <b>0.76 [0.59,0.98]</b> | <b>0.76 [0.59,0.98]</b> |

|                                                                                          |      |      |                         |                  |                  |
|------------------------------------------------------------------------------------------|------|------|-------------------------|------------------|------------------|
| G Trade; repair of motor vehicles and of domestic articles                               | 1064 | 3.45 | 1.03 [0.93,1.14]        | 1.02 [0.92,1.13] | 1.03 [0.93,1.14] |
| H Hotels and restaurants                                                                 | 269  | 0.99 | 0.87 [0.75,1.01]        | 0.86 [0.74,1.00] | 0.88 [0.76,1.02] |
| I Transport and communication                                                            | 182  | 0.68 | 0.86 [0.73,1.02]        | 0.84 [0.71,1.00] | 0.84 [0.70,1.00] |
| J Financial intermediation; insurance                                                    | 335  | 1.03 | 1.10 [0.96,1.27]        | 1.05 [0.91,1.21] | 1.04 [0.90,1.20] |
| K Real estate, renting, IT activities; research and development; other business services | 532  | 1.63 | 1.06 [0.94,1.19]        | 1.02 [0.90,1.15] | 1.02 [0.91,1.15] |
| LA Public administration                                                                 | 277  | 0.75 | <b>1.20 [1.03,1.39]</b> | 1.15 [0.99,1.34] | 1.14 [0.98,1.32] |
| LB Defence                                                                               | 40   | 0.12 | 1.00 [0.72,1.39]        | 1.03 [0.74,1.43] | 1.01 [0.73,1.41] |
| LC Compulsory social security                                                            | 12   | 0.04 | 1.02 [0.56,1.85]        | 1.01 [0.56,1.84] | 1.00 [0.55,1.81] |
| M Education                                                                              | 642  | 2.02 | 1.03 [0.93,1.15]        | 1.00 [0.90,1.12] | 1.00 [0.89,1.11] |
| N Health and social activities                                                           | 970  | 3.16 | 1.00 Ref.               | 1.00 Ref.        | 1.00 Ref.        |
| O Other community, social and personal service activities                                | 352  | 1.19 | 0.94 [0.82,1.07]        | 0.90 [0.79,1.03] | 0.90 [0.79,1.03] |
| P Domestic services                                                                      | 28   | 0.14 | 0.80 [0.51,1.23]        | 0.70 [0.45,1.10] | 0.73 [0.47,1.13] |
| Q Extra-territorial organizations and bodies                                             | 84   | 0.27 | 1.12 [0.88,1.43]        | 0.95 [0.74,1.22] | 0.99 [0.77,1.27] |

<sup>a</sup> Occupation is coded using the International Classification of Occupations, version 1988 (ISCO-88), coded on 1 digit.

<sup>b</sup> Economic activity/industry is coded using the General Classification of Economic Activities (NOGA), based on ISCI third and NACE first revisions

\* Univariate model

\*\* Adjusted for age, time period and canton

\*\*\* Adjusted for age, time period, canton, civil status, civil status x age and nationality

Statistically significant estimates and p-values<0.05 are shown in bold
