# Supplementary material for: Occupational Factors and Socioeconomic Differences in Breast Cancer Risk and Stage at Diagnosis in Swiss Working Women
Source: MDPI journal article supplement (doi:10.3390/cancers14153713), 2022-07-29
Supplement: s1 [file s1]

(a)

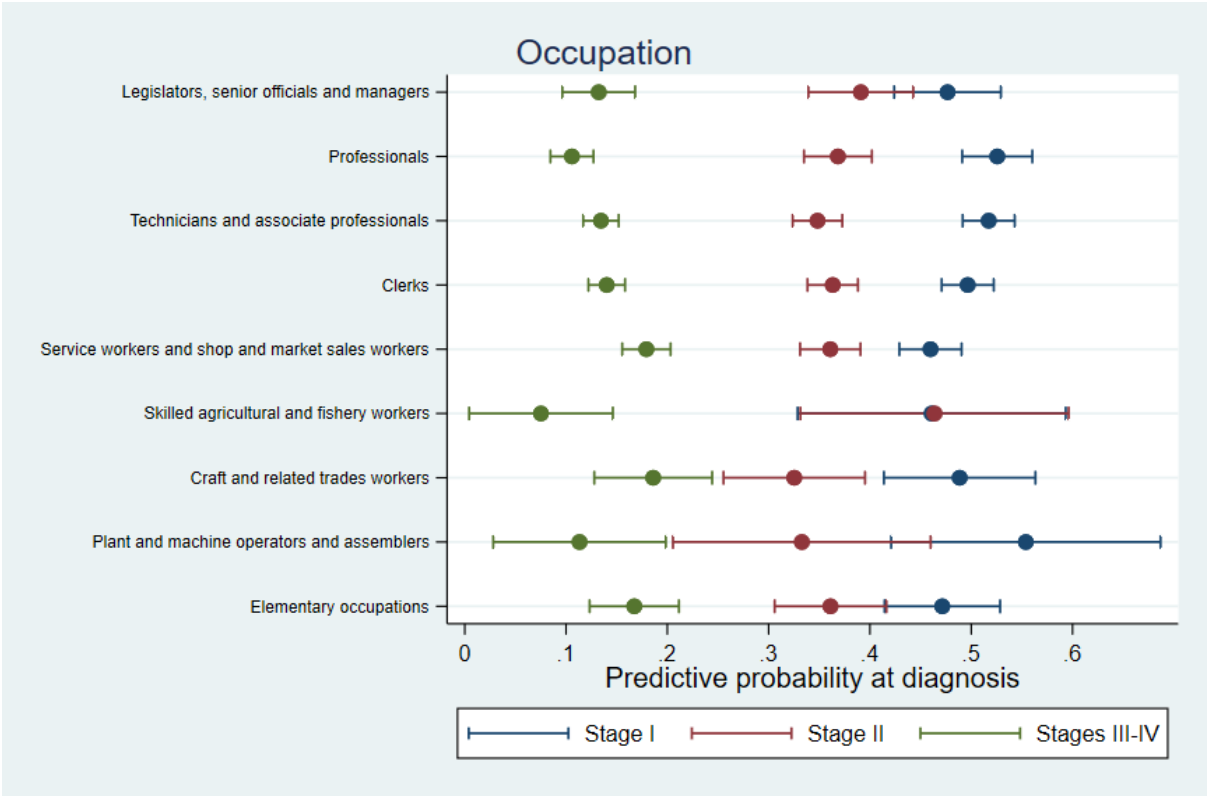

(b)

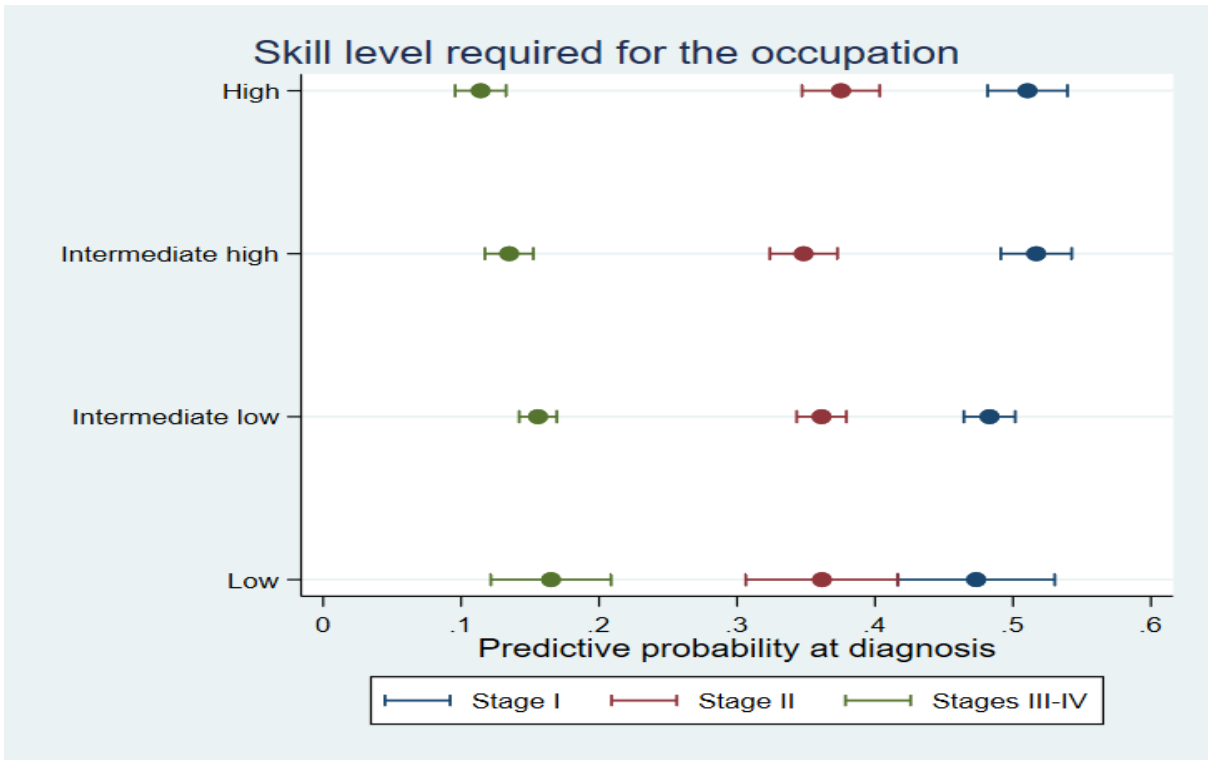

(c)

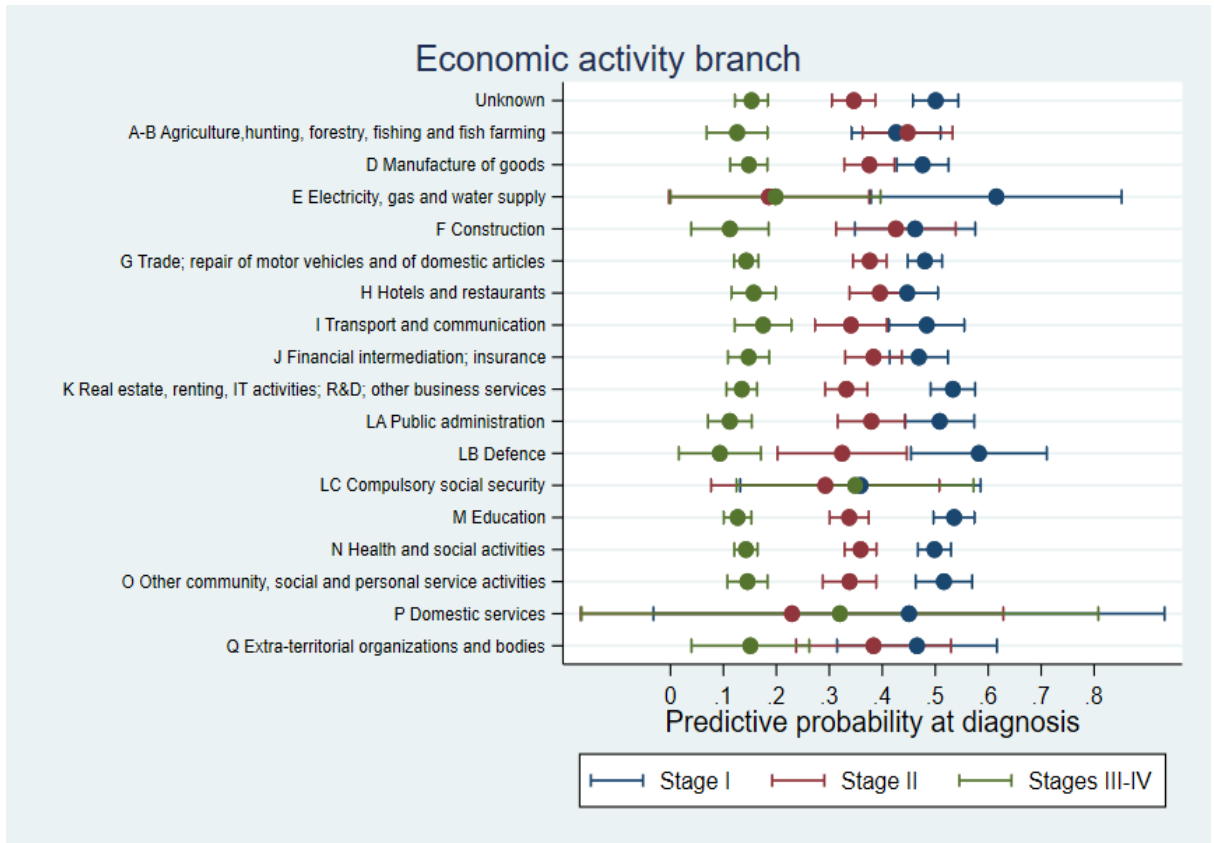

(d)

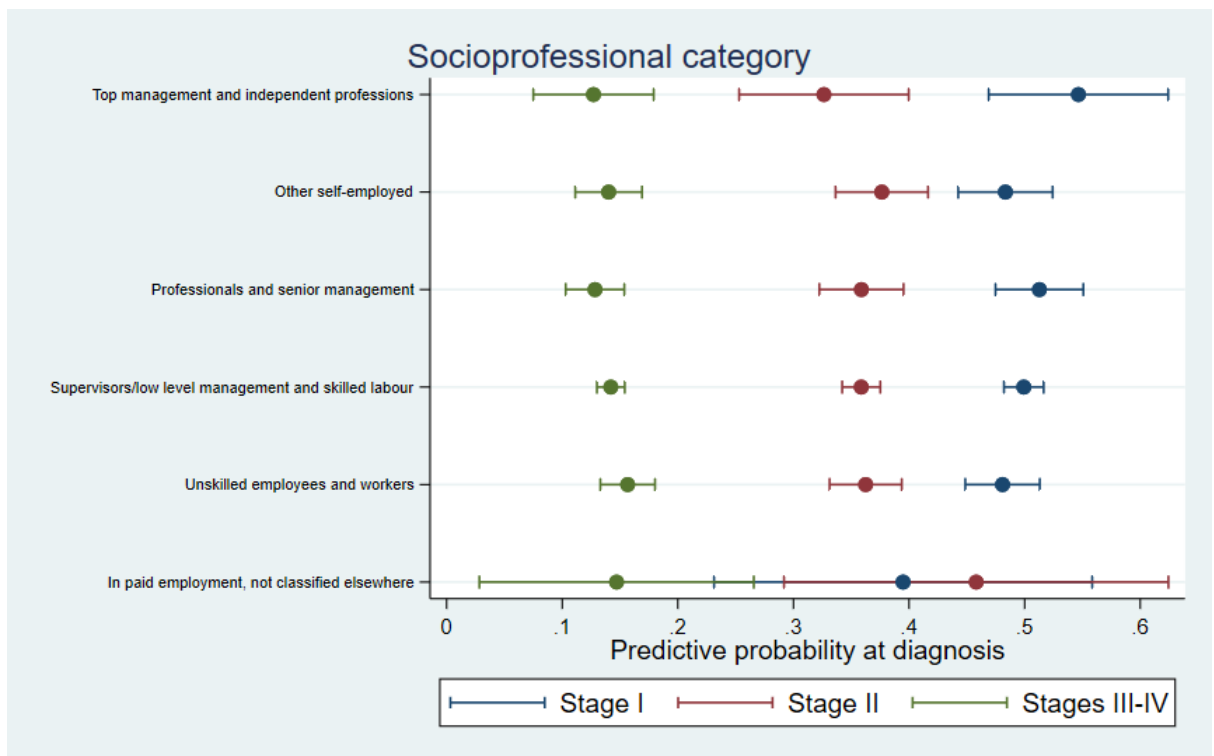

**Figure S3. Predictive probability of being diagnosed with breast cancer of stage I, II or III-IV by (a) occupation, (b) skill level required for the occupation, (c) economic activity branch and (d) socioprofessional category, adjusted for age, calendar time, canton, marital status and nationality, females in western Switzerland, 2000-2014**

(a)

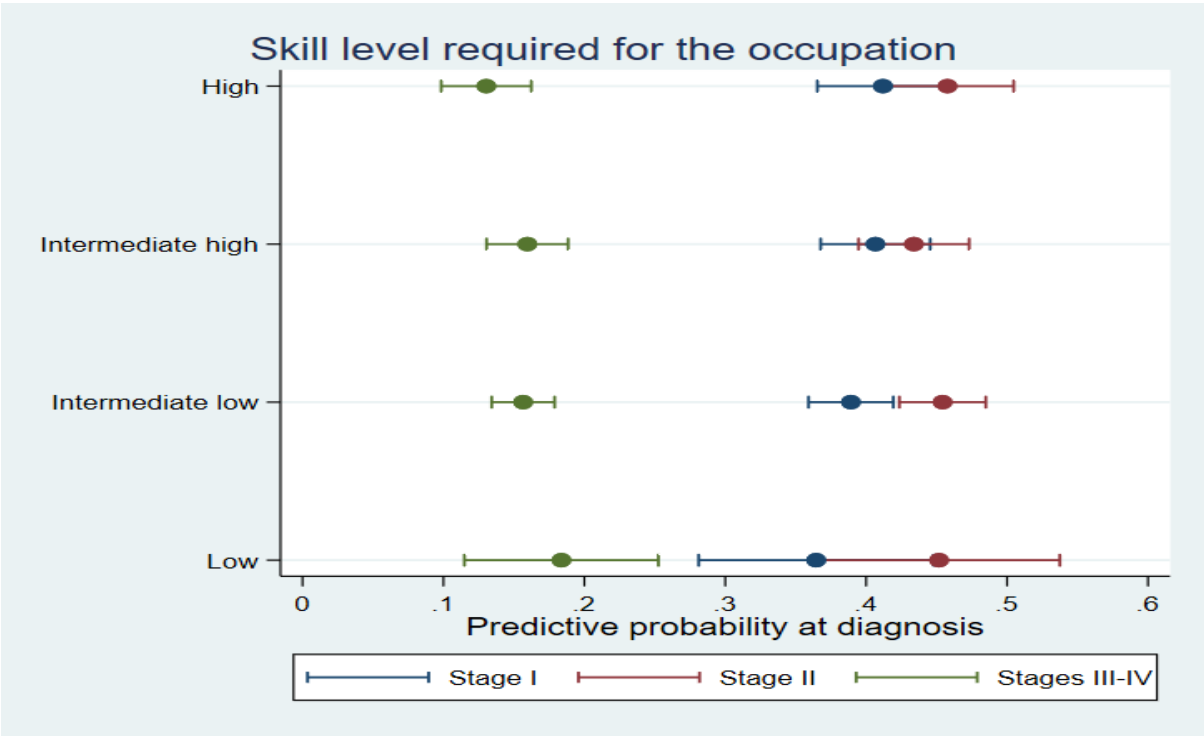

(b)

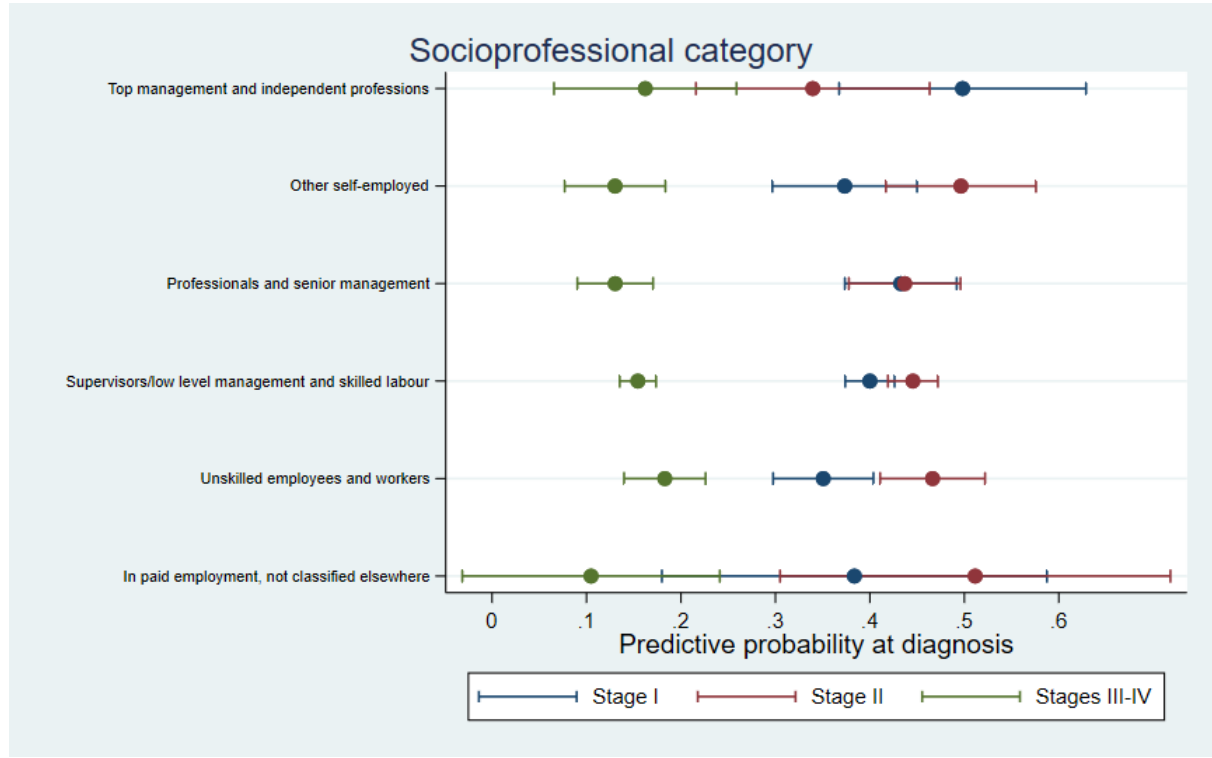

(c)

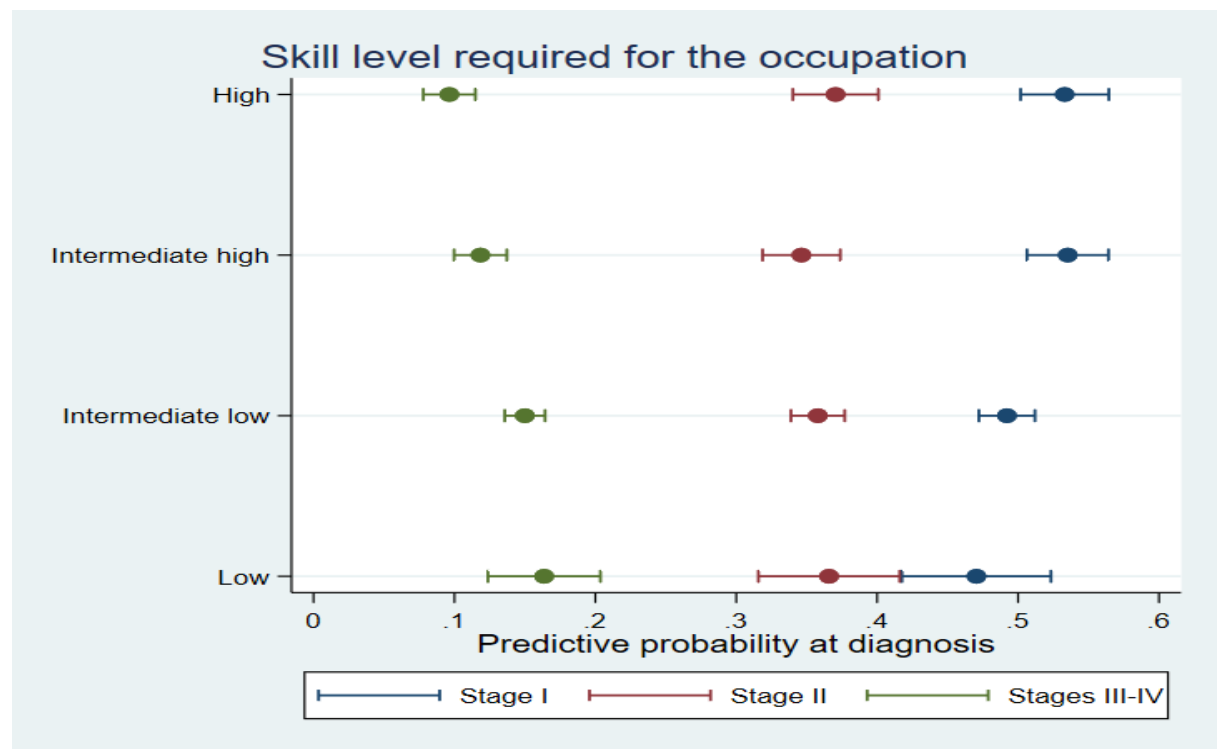

(d)

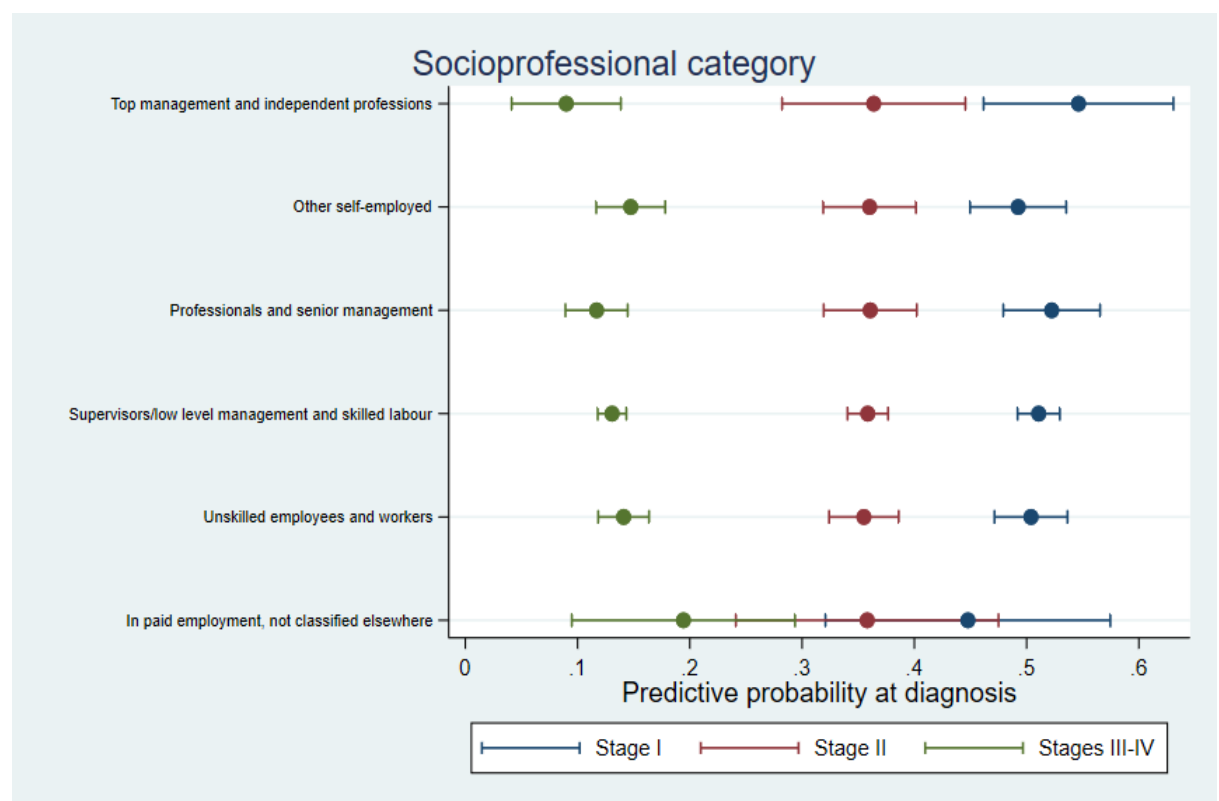

**Figure S4. Predictive probability of being diagnosed with breast cancer of stage I, II or III-IV for women below age 50 by (a) skill level required for the occupation and (b) socioprofessional category, and for women aged 50 and over by (c) skill level required for the occupation and (d) socioprofessional category, adjusted for age, calendar time, canton, marital status and nationality, females in western Switzerland, 1990-2014**
