# Supplementary figures and images for: Occupational Factors and Socioeconomic Differences in Breast Cancer Risk and Stage at Diagnosis in Swiss Working Women
Source: MDPI journal article supplement (doi:10.3390/cancers14153713), 2022-07-29

## Economic activity branch (2005-2014)

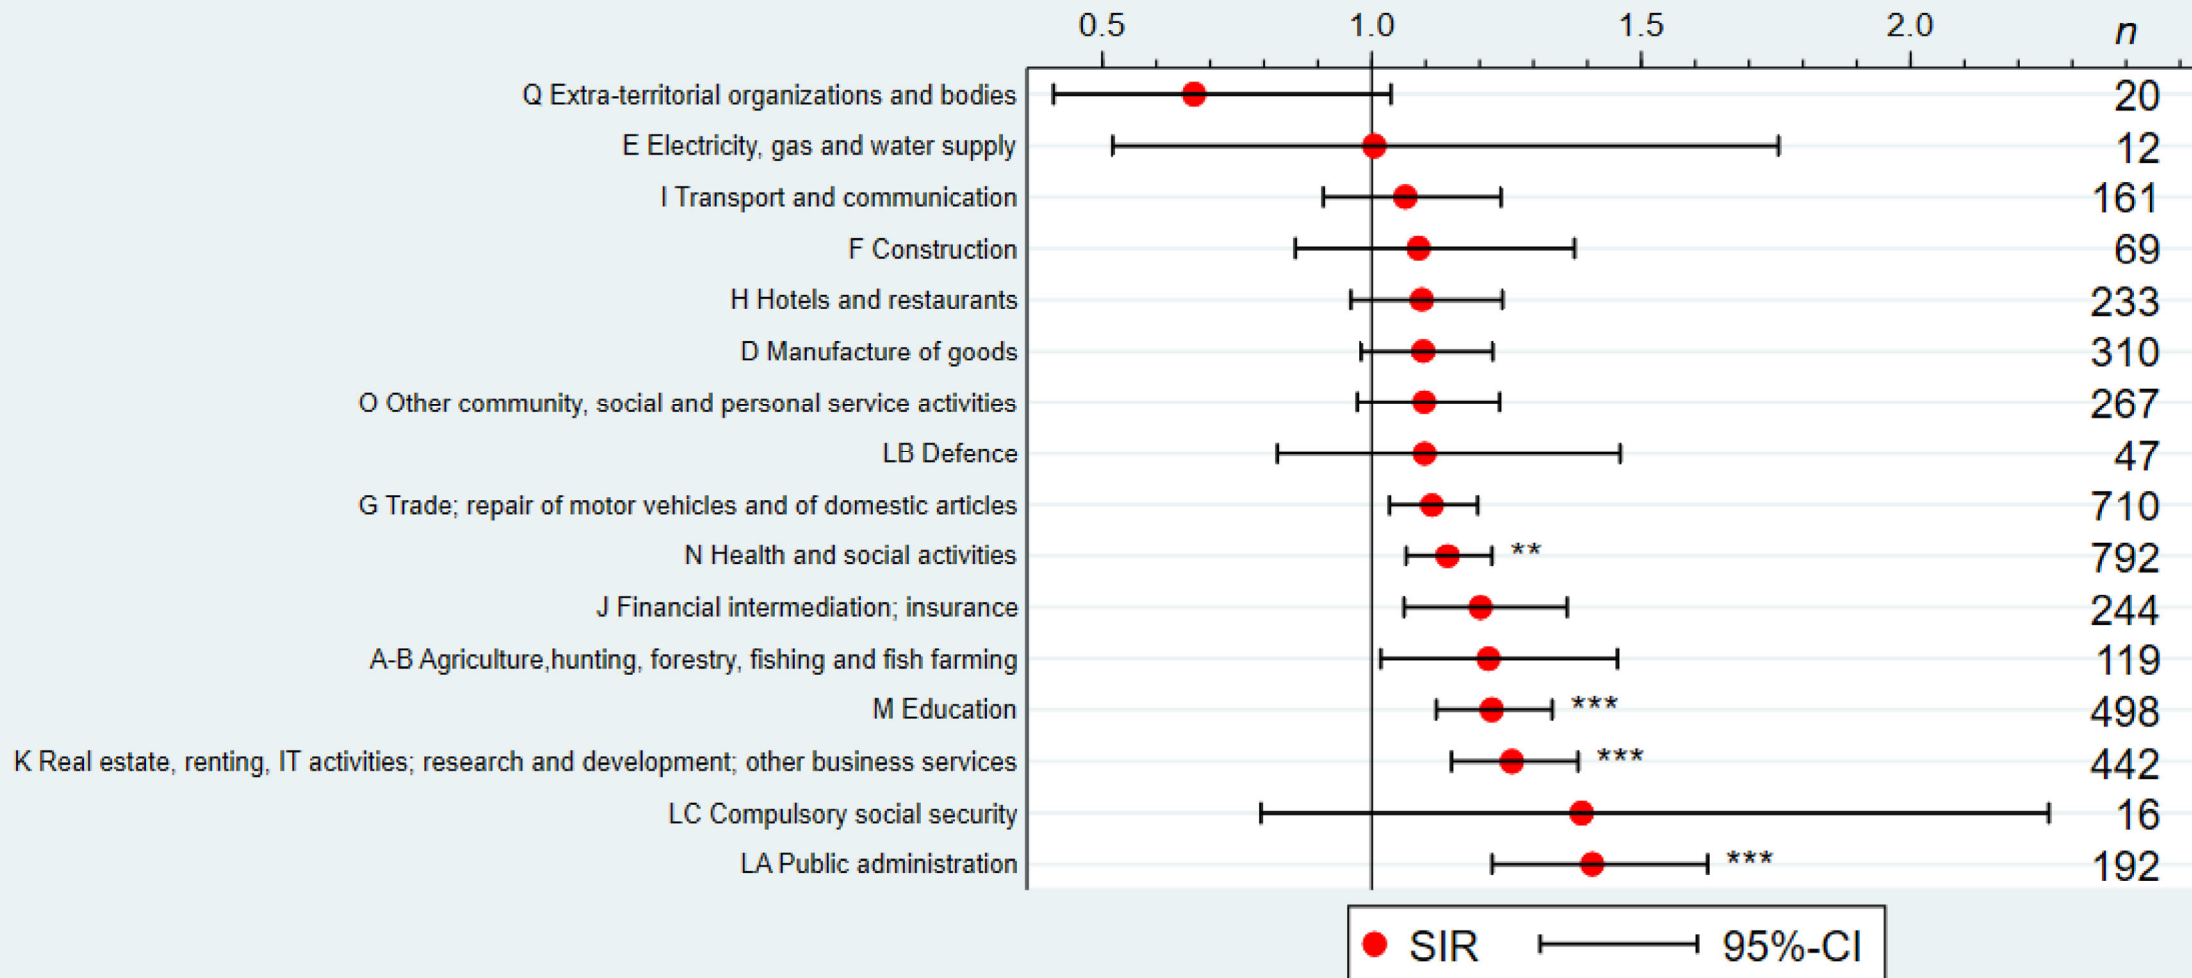

Holm-Bonferroni correction (p-value < 0.001\*\*\*, < 0.01\*\*, < 0.05\*)

Supplement: s1 [file s1]

## Occupation (2005-2014)

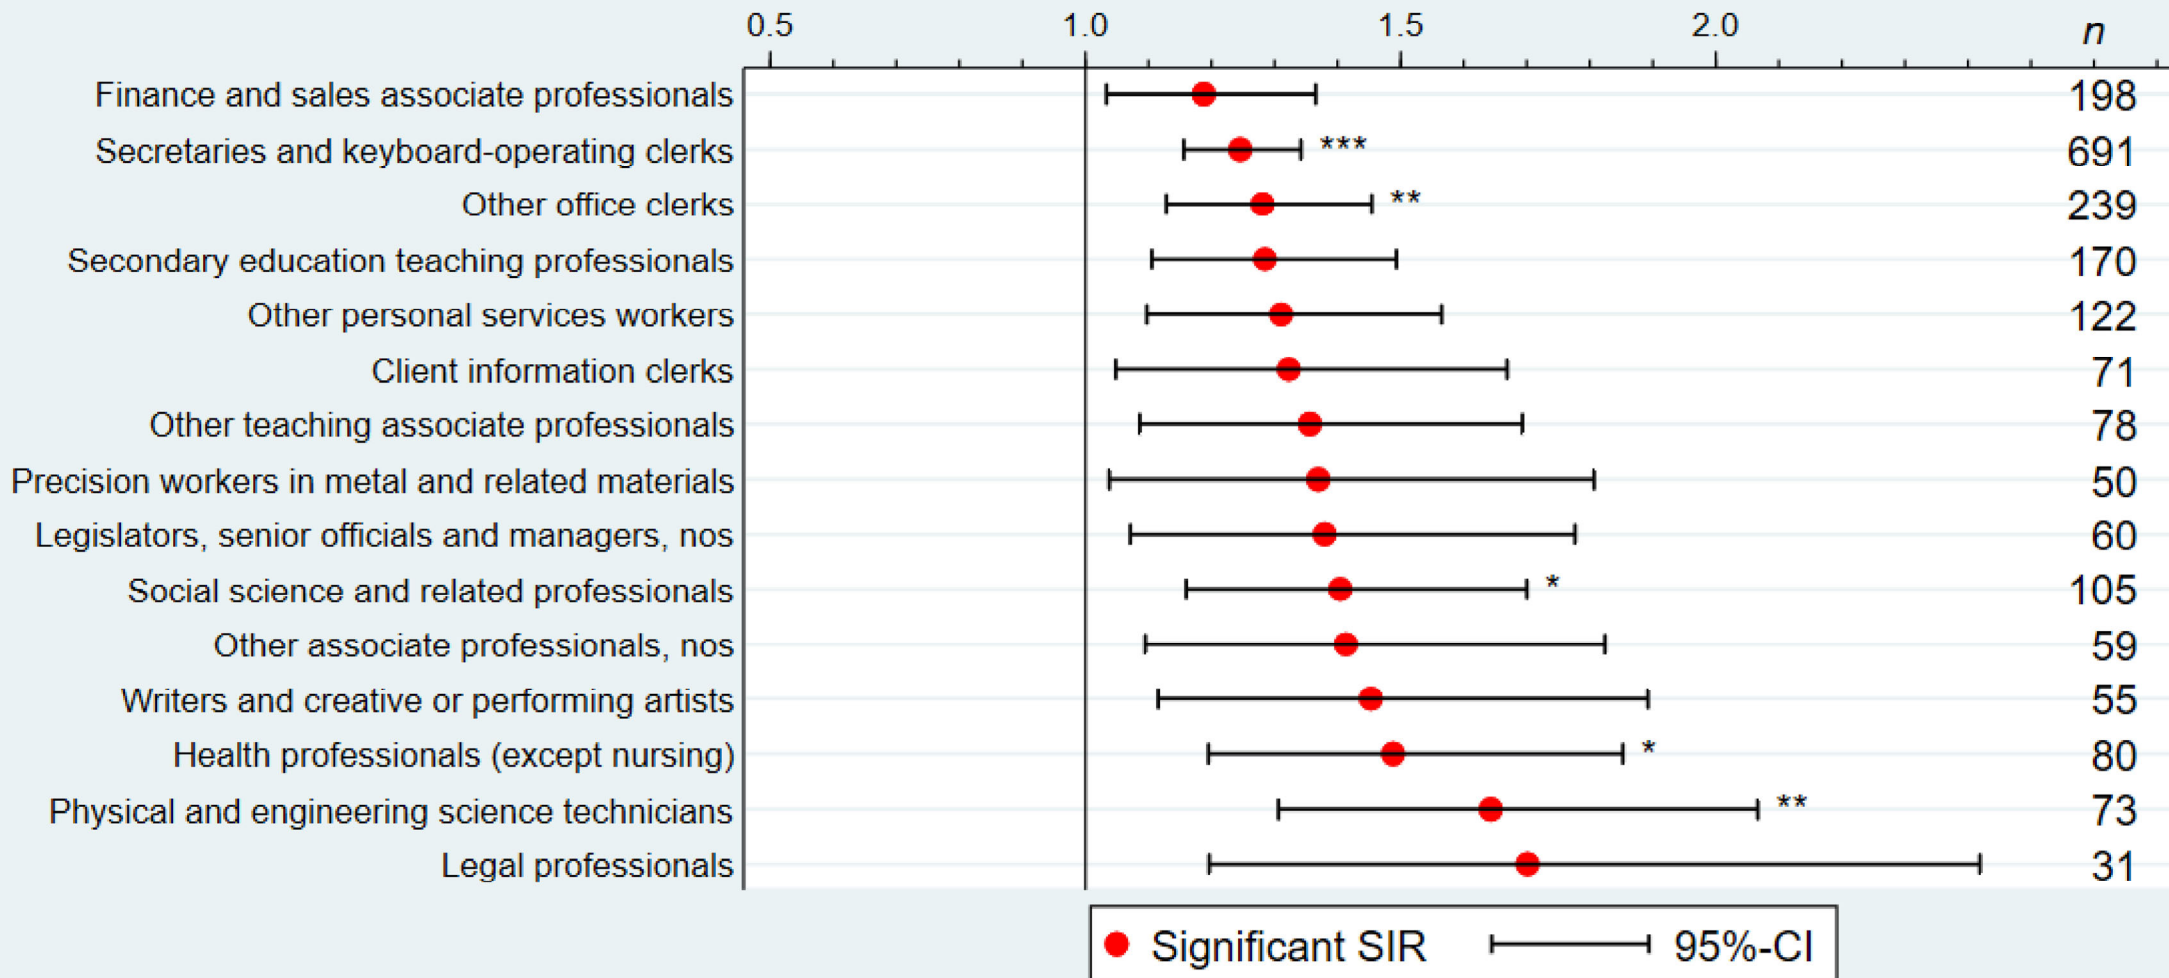

Holm-Bonferroni correction (p-value < 0.001\*\*\*, < 0.01\*\*, < 0.05\*)

Supplement: s1 [file s1]
